# Supplementary material for: Molecular diagnosis of diffuse glioma using a chip-based digital PCR system to analyze IDH, TERT, and H3 mutations in the cerebrospinal fluid
Source: PubMed Central journal article supplement (PMC7910241; doi:10.1007/s11060-020-03682-7), 2021-01-08
Supplement: 11060_2020_3682_MOESM1_ESM.pdf [file 11060_2020_3682_MOESM1_ESM.pdf]

Supplementary figures and  
tables

- **Molecular diagnosis of diffuse glioma using a chip-based digital PCR system to analyze *IDH*, *TERT*, and *H3* mutations in the cerebrospinal fluid**

- Yutaka Fujioka<sup>1</sup>, Nobuhiro Hata<sup>1,\*</sup>, Yojiro Akagi<sup>1</sup>, Daisuke Kuga<sup>1</sup>, Ryusuke Hatae<sup>1</sup>, Yuhei Sangatsuda<sup>1</sup>, Yuhei Michiwaki<sup>1</sup>, Takeo Amemiya<sup>1</sup>, Kosuke Takigawa<sup>1</sup>, Yusuke Funakoshi<sup>1</sup>, Aki Sako<sup>1</sup>, Toru Iwaki<sup>2</sup>, Koji Iihara<sup>1</sup>, Masahiro Mizoguchi<sup>1</sup>

- <sup>1</sup>Department of Neurosurgery, Graduate School of Medical Sciences, Kyushu University, Fukuoka, Japan

- <sup>2</sup>Department of Neuropathology, Graduate School of Medical Sciences, Kyushu University, Fukuoka, Japan

- **\* Correspondence, proofs, and reprint requests to:**

- Nobuhiro Hata, MD, PhD

- Department of Neurosurgery, Graduate School of Medical Science, Kyushu University, 3-1-1 Maidashi, Higashi-ku, Fukuoka 812-8582, Japan.

- Tel: +81-92-642-5524

- Fax: +81-92-642-5526

- E-mail: [hatanobu@ns.med.kyushu-u.ac.jp](mailto:hatanobu@ns.med.kyushu-u.ac.jp)

## Supplementary table 1

### Assay data

| mutation                     | Assay ID       | product length(bp) | Forward Primer           | Reverse Primer           | Wild type probe  | Mutation probe     |
|------------------------------|----------------|--------------------|--------------------------|--------------------------|------------------|--------------------|
| IDH R132H                    | ANDJ4XD        | 88                 | GCAAAATCACATTATTGCCAACA  | CTTGTGAGTGGATGGGTAAAACCT | AAGCATGACGACCTAT | TAAGCATGATGACCTATG |
| H3K27M                       | ANFVT27        | 107                | CTTTGTCCCATTTTTTTCCTGTTT | GAAGCAACTGGCTACAAAAGCC   | CGCACTCTTGCGAGC  | CGCACTCATGCGAGC    |
| TERT promoter mutation C228T | Hs000000092_rm | NA                 | NA                       | NA                       | NA               | NA                 |
| TERT promoter mutation C250T | Hs000000093_rm | NA                 | NA                       | NA                       | NA               | NA                 |

NA: not available

Supplementary table 2

IDH1R132H mutation and H3K27M mutation

| Stage 1   | Stage 2      |        | Stage 3   |        |
|-----------|--------------|--------|-----------|--------|
| 96°C      | 56.0°C       | 98.0°C | 60.0°C    | 10.0°C |
| 10 min    | 2 min        | 30 s   | 2 min     | ∞      |
| 1x (Hold) | 39x (Cycles) |        | 1x (Hold) |        |

TERT promoter mutation C228T and C250T

| Stage 1   | Stage 2      |        | Stage 3   |        |
|-----------|--------------|--------|-----------|--------|
| 96°C      | 55.0°C       | 98.0°C | 55.0°C    | 10.0°C |
| 10 min    | 2 min        | 30 s   | 2 min     | ∞      |
| 1x (Hold) | 54x (Cycles) |        | 1x (Hold) |        |

Supplementary table 3

|                                   | 1 reaction $\mu\text{L}$ | Final concentration $\text{ng}/\mu\text{L}$ |
|-----------------------------------|--------------------------|---------------------------------------------|
| Digital PCR master mix v2         | 7.25                     | 1x                                          |
| Taqman Assay 20x (primer + probe) | 0.75                     | 1x                                          |
| Nuclease free water               | 6.5-X                    |                                             |
| Template DNA                      | X                        | X/14.5                                      |
| Total                             | 14.5                     |                                             |

X: Up to 6.5  $\mu\text{L}$

Supplementary table 4

| Taqman Assay                 | X    | Y    |
|------------------------------|------|------|
| IDH1 R132H mutation          | 1200 | 4000 |
| H3F3A K27M mutation          | 1400 | 4000 |
| TERT promoter mutation C228T | 350  | 1200 |
| TERT promoter mutation C250T | 400  | 2000 |

VIC threshold = mode + X

FAM threshold = mode + Y

Supplementary table 5  
Molecular diagnosis

| Molecular diagnosis | WHO grading | Tumor DNA |          |          |         | N | matched | sensitivity |
|---------------------|-------------|-----------|----------|----------|---------|---|---------|-------------|
|                     |             | IDH       | TERT 228 | TERT 250 | H3 K27M |   |         |             |
| GBM,IDH mut         | <b>IV</b>   | mut       | wt       | wt       | wt      | 4 | 4       | 100%        |
| GBM,IDH wt          | <b>IV</b>   | wt        | mut      | wt       | wt      | 3 | 3       | 100%        |
|                     |             |           | wt       | mut      |         |   |         |             |
| DMG,H3K27M          | <b>IV</b>   | wt        | wt       | wt       | mut     | 5 | 4       | 80%         |
| AO,IDH mut          | <b>III</b>  | mut       | mut      | wt       | wt      | 8 | 8       | 100%        |
|                     |             |           | wt       | mut      |         |   |         |             |
| AA,IDH mut          | <b>III</b>  | mut       | mut      | wt       | wt      | 2 | 1       | 50%         |
| AA,IDH wt           | <b>III</b>  | wt        | mut      | wt       | wt      | 2 | 0       | 0%          |
|                     |             |           | wt       | mut      |         |   |         |             |
| OD,IDH mut          | <b>II</b>   | mut       | mut      | wt       | wt      | 1 | 0       | 0%          |
|                     |             |           | wt       | mut      |         |   |         |             |
| DA,IDH mut          | <b>II</b>   | mut       | wt       | wt       | wt      | 1 | 0       | 0%          |
| DA,IDH wt           | <b>II</b>   | wt        | mut      | wt       | wt      | 2 | 0       | 0%          |
|                     |             |           | wt       | mut      |         |   |         |             |
| GBMorAAorDA         | <b>-</b>    | wt        | wt       | wt       | wt      | 6 | 6       | 100%        |

mut: mutant wt: wildtype GBM: glioblastoma DMG: diffuse midline glioma AO: anaplastic oligodendroglioma AA: anaplastic astrocytoma  
OD: oligodendroglioma DA: diffuse astrocytoma

# Supplementary Fig 1a

Scatter plot

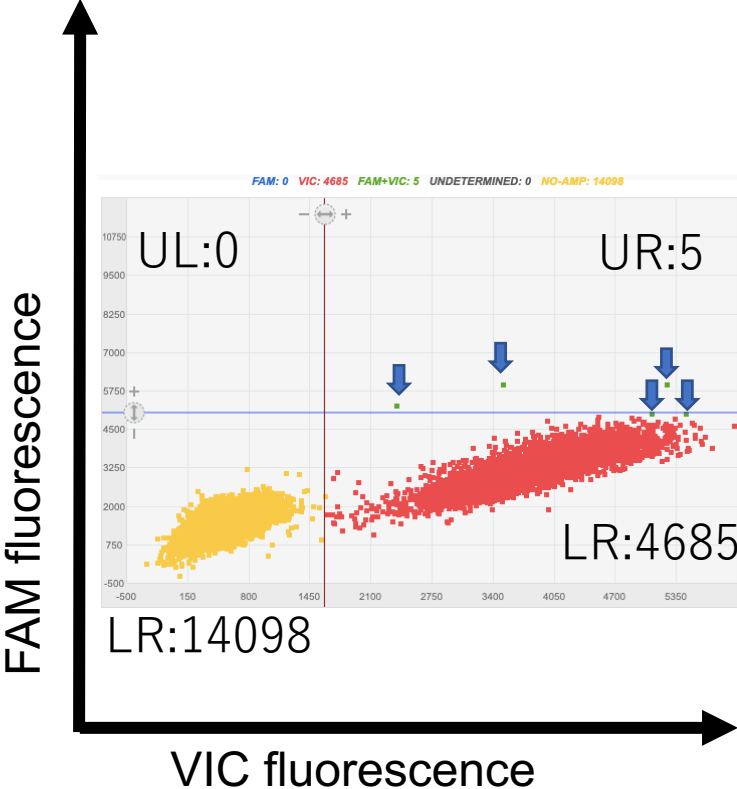

UL: Upper left  
UR: Upper right  
LL: Lower left  
LR: Lower right

Histogram

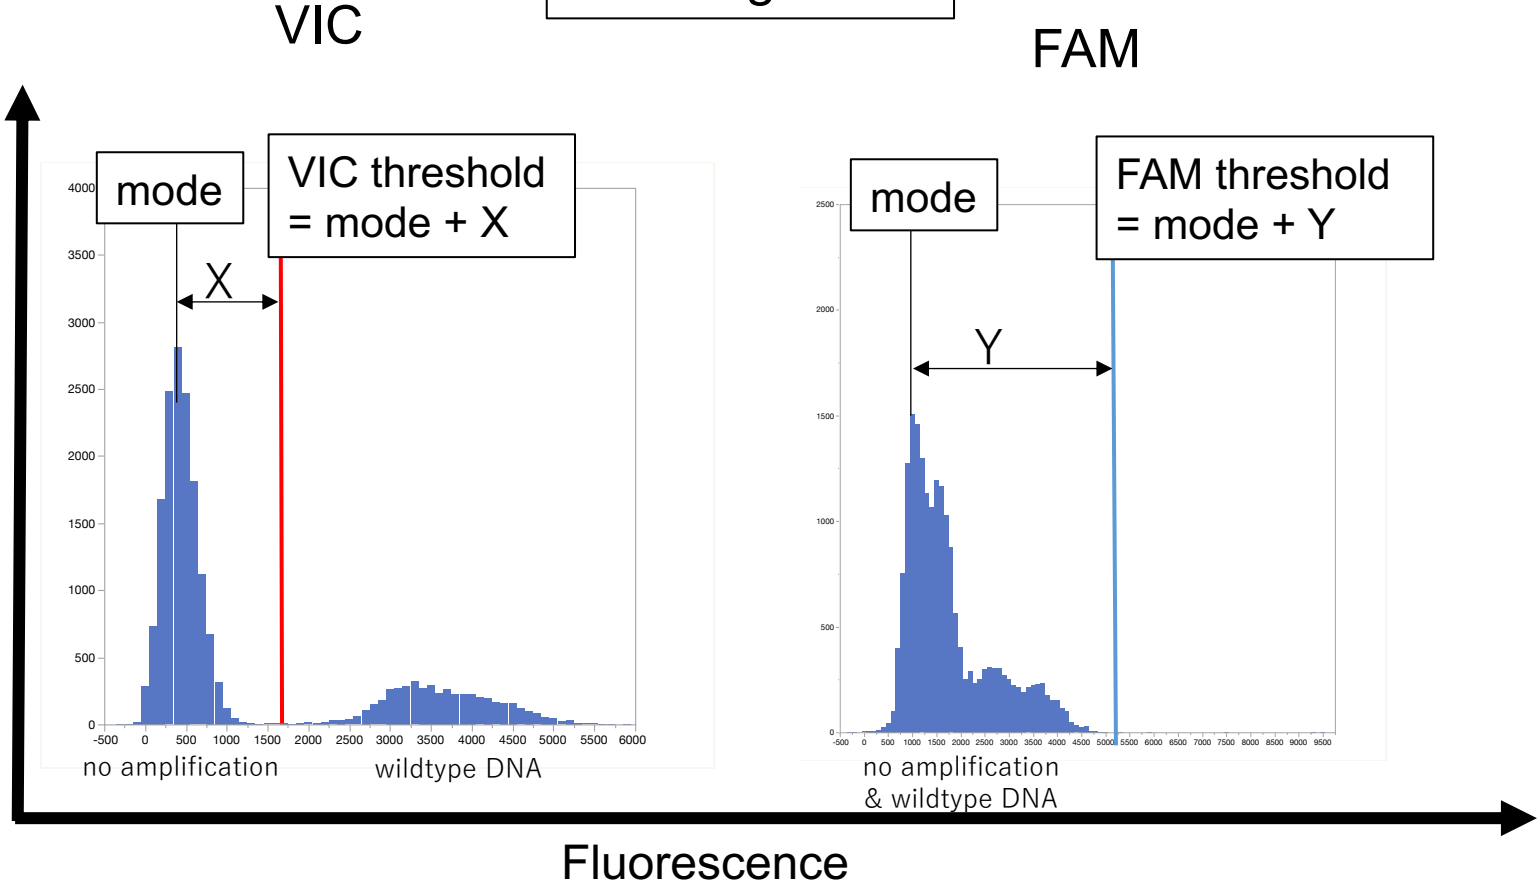



# Supplementary Fig 1b

FC: 0.1 ng/ $\mu$ L

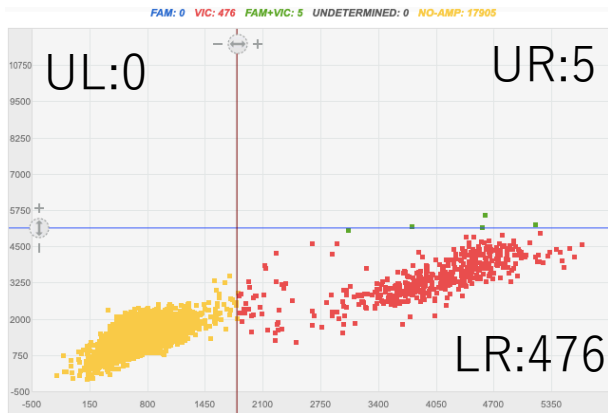

LL:17905

FC: 0.01 ng/ $\mu$ L

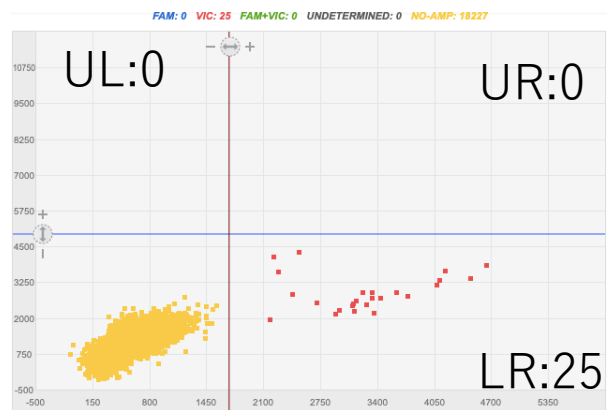

LL:18277

FAM fluorescence

VIC fluorescence

Well counts

VIC

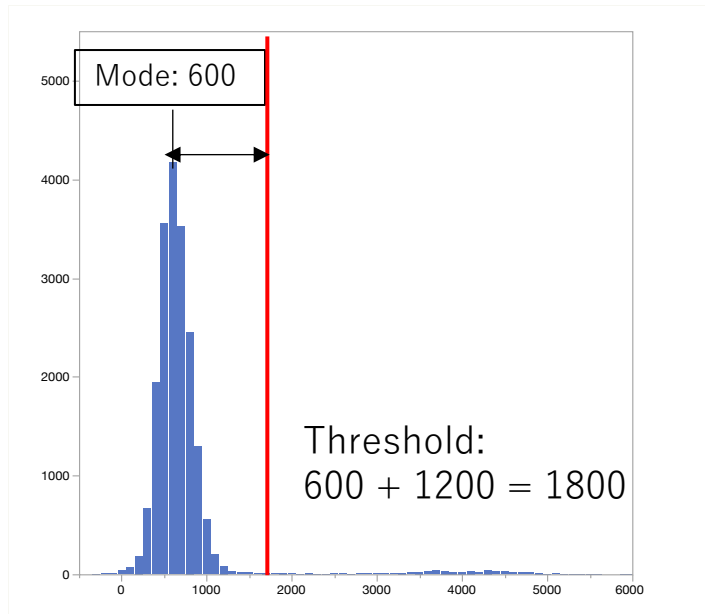

FAM

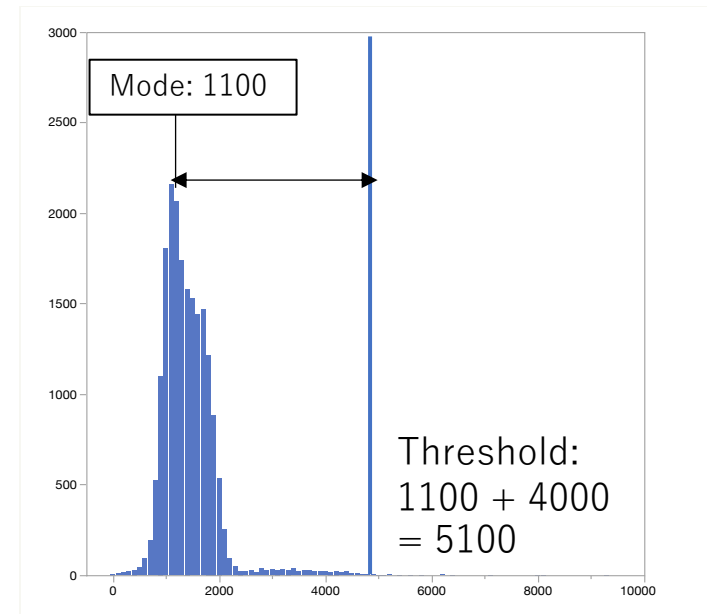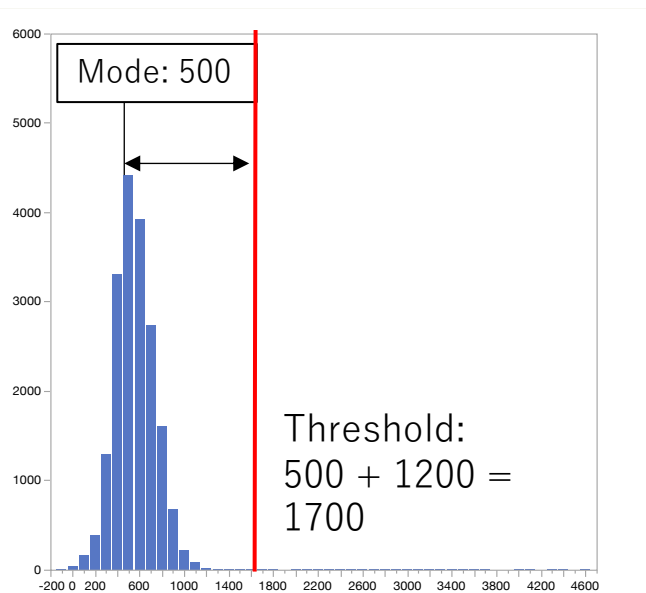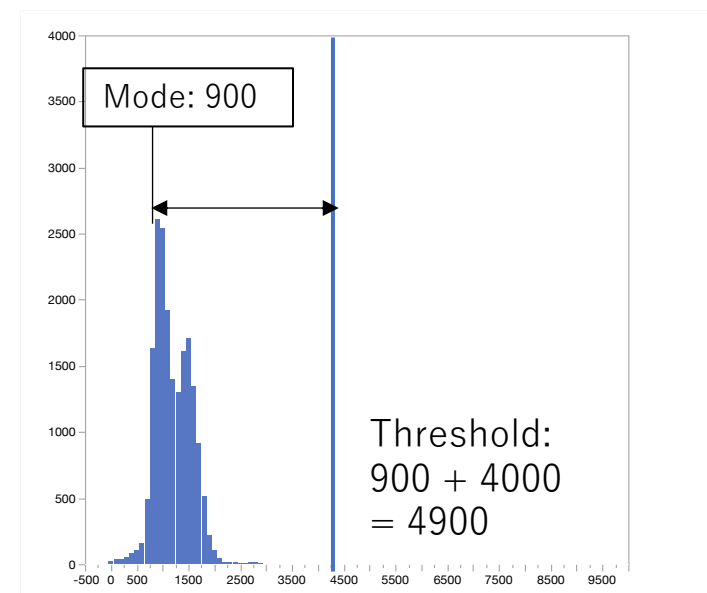

Fluorescence

# Supplementary Fig 1c

## IDH1 R132H mutation assay

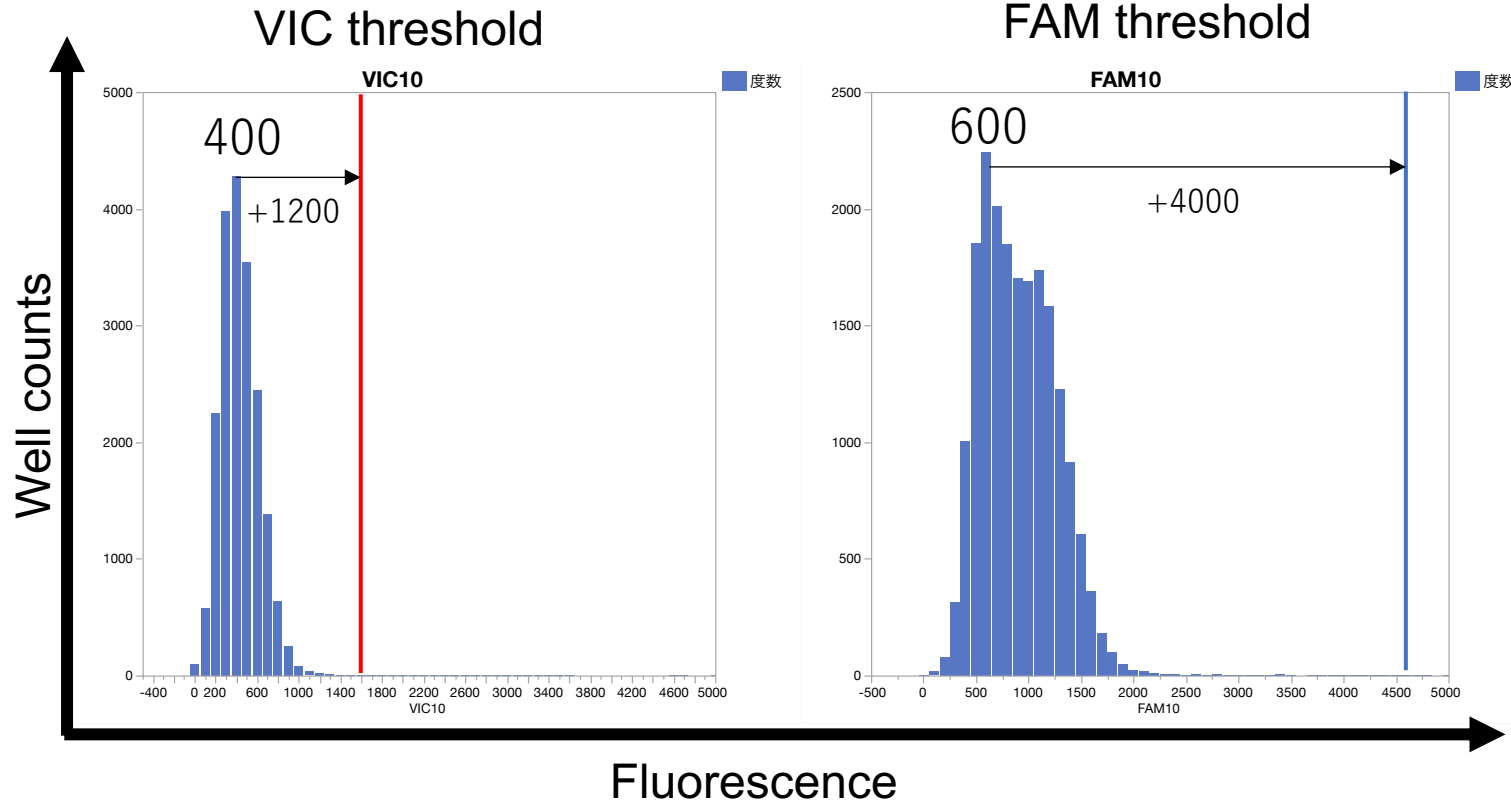

Mode: 400  
VIC threshold:  
Mode + 1200 = 1600

Mode: 600  
FAM threshold:  
Mode + 4000 = 4600

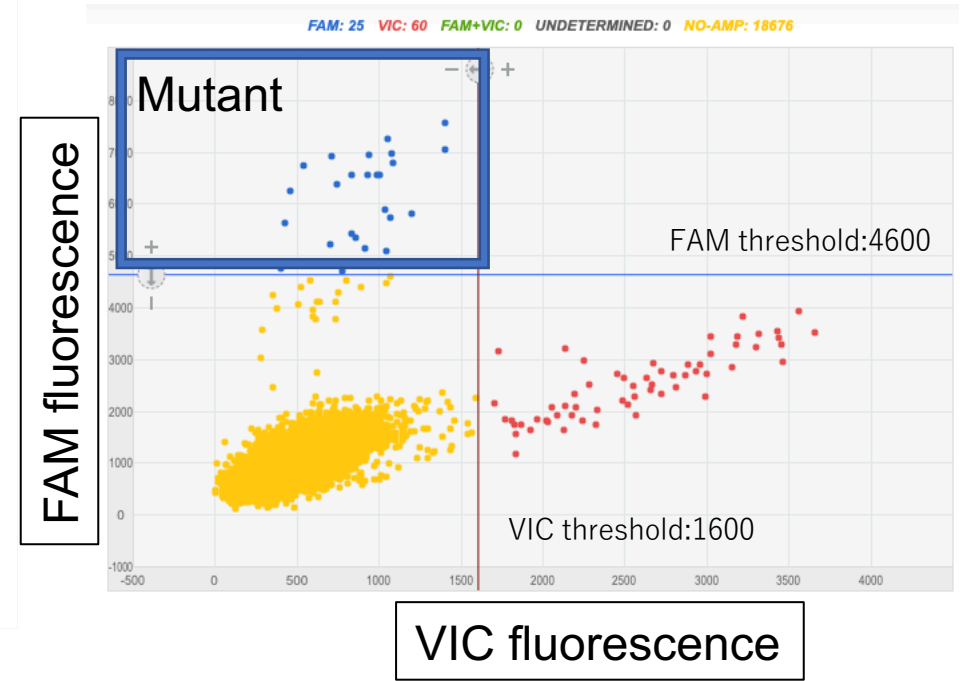

# Supplementary Fig 2

Mutant

Wild type

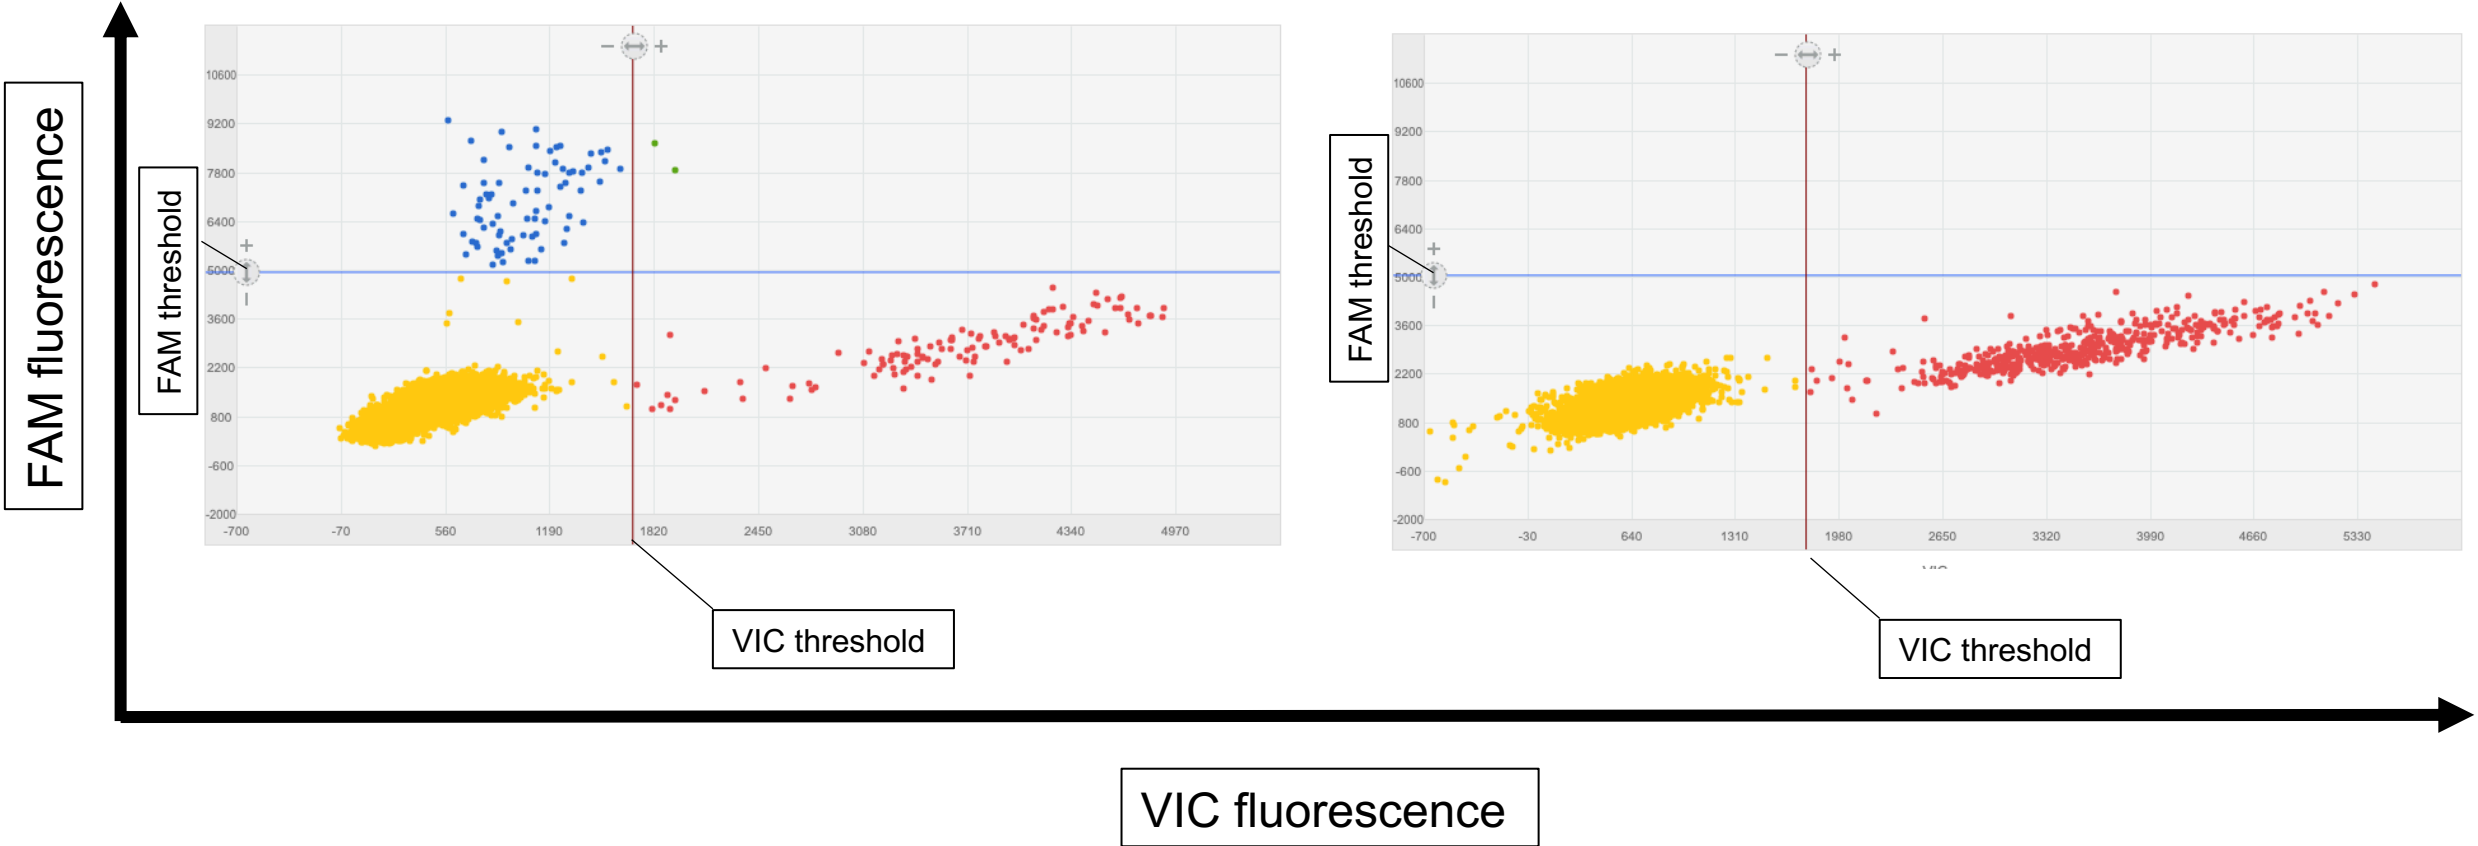

Supplementary  
**Fig 3a:**  
MRI imaging

FLAIR

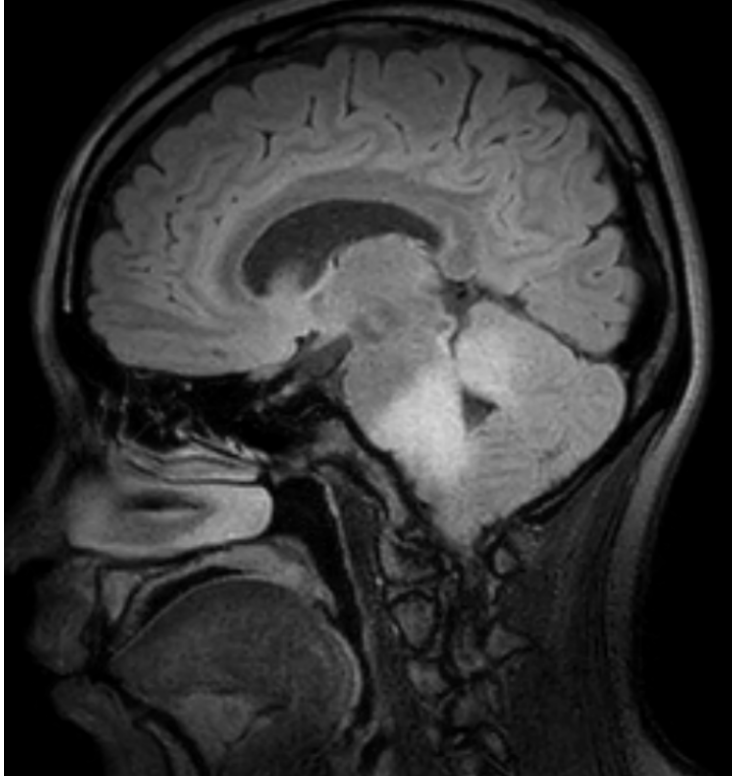

GdT1WI

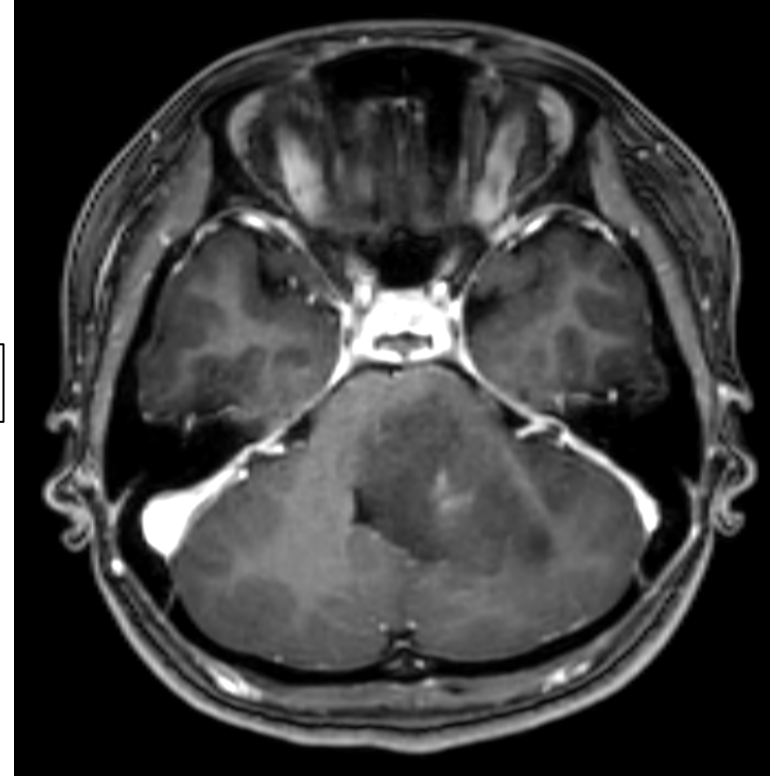

Pathological  
finding

Supplementary  
**Fig 3b**

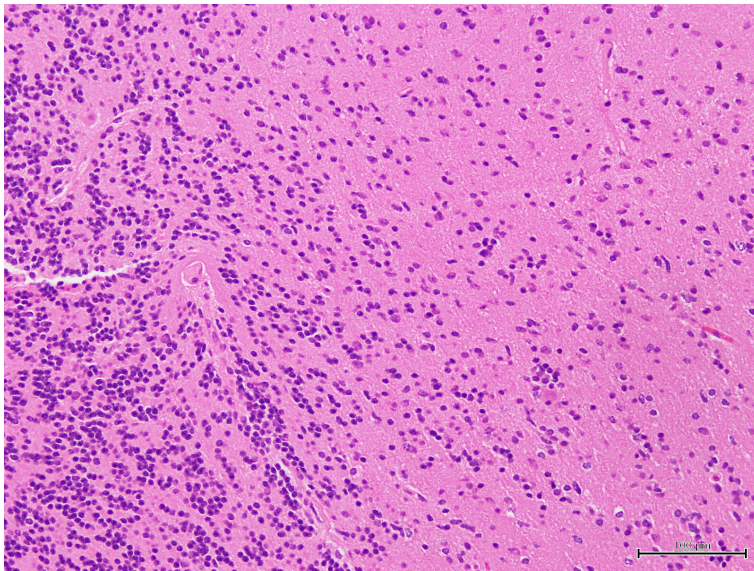

Supplementary  
**Fig 3c**

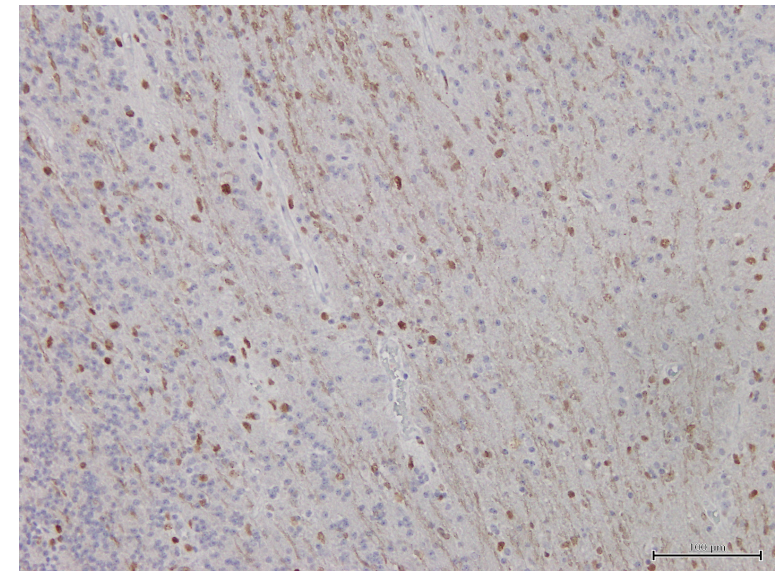

Supplementary  
**Fig 3d:**  
Tumor DNA

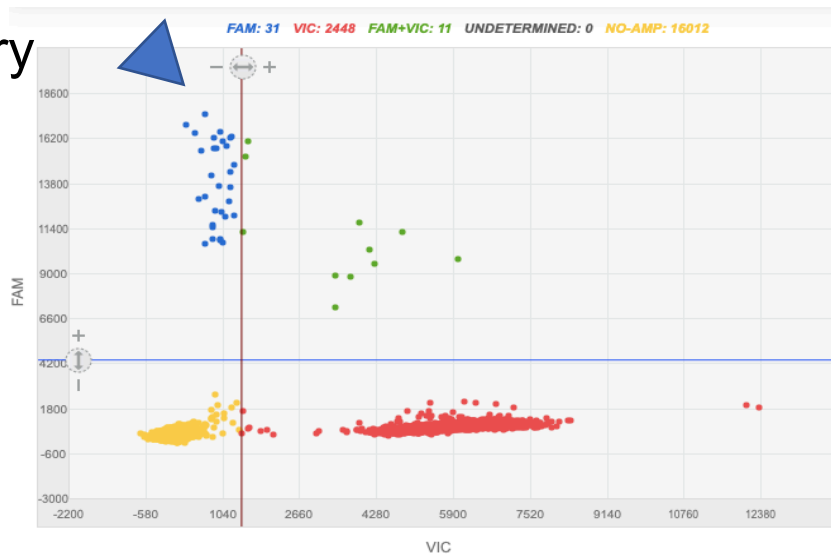

Digital PCR: positive

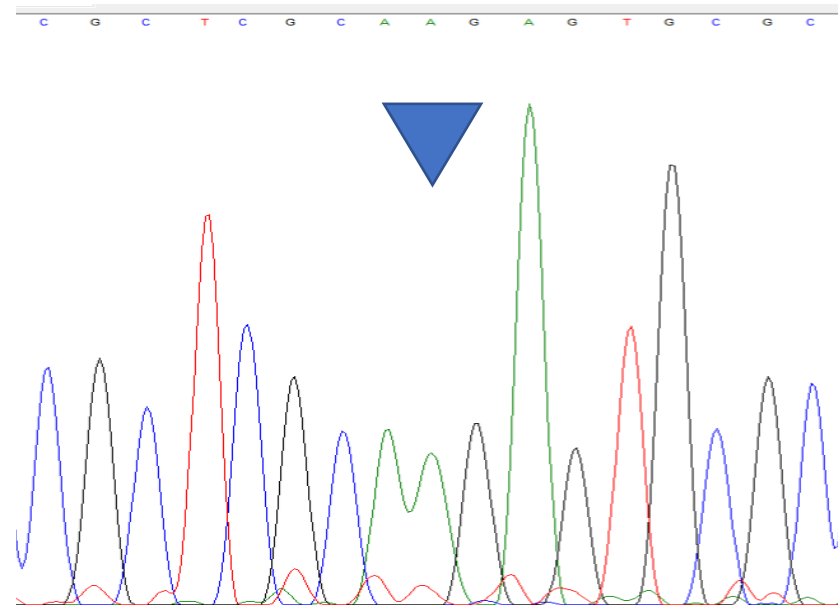

Sanger sequence: wild type

Supplementary  
**Fig 3e:**  
cfDNA in CSF

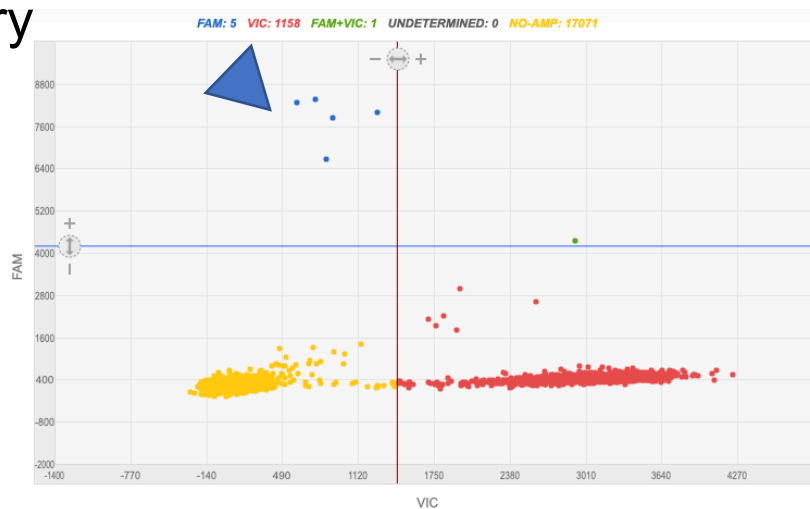

Intracranial CSF

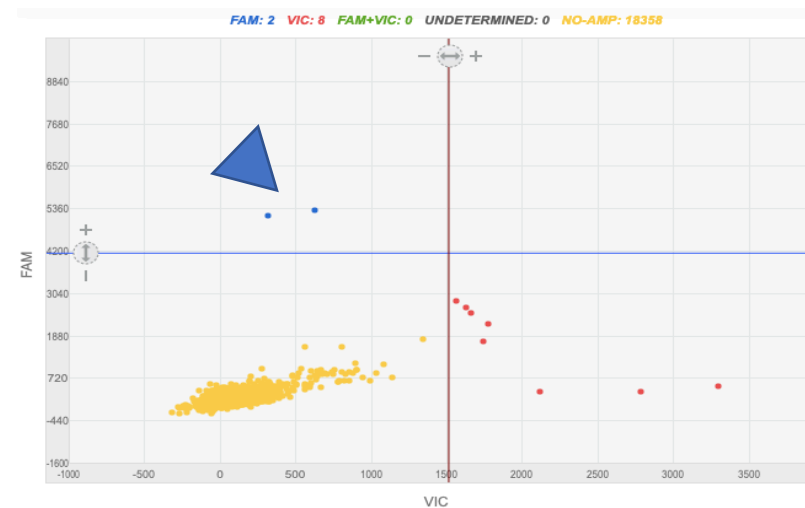

Lumbar puncture CSF
